# Supplementary material for: Intrathecal Morphine Is Associated with Less Delirium Following Hip Fracture Surgery: A Register Study
Source: PubMed Central journal article supplement — Anesth Pain Med. 2020 Aug 26;10(4):e106076. doi: 10.5812/aapm.106076 (PMC7539054; doi:10.5812/aapm.106076), 2020-08-26
Supplement: aapm-10-4-106076-s001.pdf [file aapm-10-4-106076-s001.pdf]

## **Appendix 1.**

### **Delirium Observation Screening Scale (DOSS).**

The patient:

1. Dozes during conversation or activities
2. Is easily distracted by stimuli from the environment
3. Maintains attention to conversation or action
4. Does not finish question or answer
5. Gives answers which do not fit the question
6. Reacts slowly to instructions
7. Thinks to be somewhere else
8. Knows which part of the day it is
9. Remembers recent event
10. Is picking, disorderly, restless
11. Pulls IV tubes, feeding tubes, catheters etc.
12. Is easily or suddenly emotional (frightened, angry, irritated)
13. Sees/hears things that are not there

Absent is 0 points, Present is 1 point. Except for items 3, 8 and 9, which are scored in reverse.
